# Supplementary material for: Detection of Pneumocystis jirovecii and Toxoplasma gondii in patients with lung infections by a duplex qPCR assay
Source: PLoS Negl Trop Dis. 2021 Dec 17;15(12):e0010025. doi: 10.1371/journal.pntd.0010025 (PMC8682901; doi:10.1371/journal.pntd.0010025)
Supplement: S2 Table — (XLSX) [file pntd.0010025.s002.xlsx]

## Sheet: Sheet1
S2 Table. Rep-529 Alignment
....|....| ....|....| ....|....| ....|....| ....|....|
10 20 30 40 50
DQ779189 CGCTGCAGGG AGGAAGACGA AAGTTGTTTT TTTATTTTTT TTTCTTTTCG
KC607824 CGCTGCAGGG AGGAAGACGA AAGTTGTTTT TTTAATTTTT TTTCTTTTTG
DQ779191 CGCTGCAGGG AGGAAGACGA AAGTTGTTTT TTTATTTTTT TTTCTTTTCG
KX963355 ---TGCAGGG AGGAAGACGA AAGTTGTTTT TTTAATTTTT TTTCTTTTTG
KX963353 ---TGCAGGG AGGAAGACGA AAGTTGTTTT TTTAATTTTT TTTCTTTTTG
DQ779193 CGCTGCAGGG AGGAAGACGA AAGTTGTTTT TTTATTTTTT TTTCTTTTCG
DQ779192 CGCTGCAGGG AGGAAGACGA AAGTTGTTTT TTTATTTTTT TTTCTTTTTG
LN714493 --CTGCAGGG AGGAAGACGA AAGTTGTTTT TTTATTTTTT TTTCTTTTTG
EF195646 --CTGCAGGG AGGAAGACGA AAGTTGTTTT TTTATTTTTT TTTCTTTTTG
LN714508 --CTGCAGGG AGGAAGACGA AAGTTGTTTT TTTA-TTTTT TTCCTTTTTG
DQ779196 CGCTGCAGGG AGGAAGACGA AAGTTGTTTT TTTATTTTTT TTTCTTTTTG
DQ779188 CGCTGCAGGG AGGAAGACGA AAGTTGTTTT TTTATTTTTT TTTCTTTTTG
DQ779190 CGCTGCAGGG AGGAAGACGA AAGTTGTTTT TTTATTTTTT TTTCTTTTTG
MG003442 CGCTGCAGGG AGGAAGACGA AAGTTGTTTT TTTATTTTTT TTTCTTTTTG
KX781159 CGCTGCAGGG AGGAAGACGA AAGTTGTTTT TTTATTTTTT TTTCTTTTTG
KX963354 ---TGCAGGG AGGAAGACGA AAGTTGTTTT TTTATTTTTT TTTCTTTTTG
DQ779195 CGCTGCAGGG AGGAAGACGA AAGTTGTTTT TTT--CTTTT TTT-TTTT-G
DQ779187 CGCTGCAGGG AGGAAGACGA AAGTTGTTTT TATATTTTTT TTTCTTTTTG
DQ779194 CGCTGCAGGG AGGAAGACGA AAGTTG--TT TTTCTTTTTT TTTCTTTTTG
EF648168 ---------- ---------- ------TTTT TTTATTTTTT TTTCTTTTCG
FJ656209 ---------- ---------- ---------- -------TTT TTTCTTTTTG
MH680820 ---TGCAGGG AGGAAGACGA AAGTTGTTTT TTTAATTTTT TTTCTTTTTG
MH884741 ---------- ---------- -----GTTTT TTTA-ATTTT TTTCTTTTTG
MH884737 ---------- ---------- -------TTT TTTATTTTTT TTTCTTTTCG
EF648169 ---------- ---------- ---------- TTTATTTTTT TTTCTTTTTG
MH884735 ---------- ---------- -----GTTTT TTTATTTTTT TTTCTTTTTG
MH884743 ---------- ---------- -------TTT TTTATTTTTT TTTCTTTTTG
MH884748 ---------- ---------- ---------- ------TTTT TTTCTTTTTG
MH884739 ---------- ---------- ---------- -------TTT TTTCTTTTTG
MH884745 ---------- ---------- -----GTTTT TTTATTTTTT TTT-TTTTTG
MH884744 ---------- ---------- -------TTT TTTATTTTTT TTTCTTTTCG
MH884736 ---------- -GGAAGACGA AAAAAGATTT TTTAATTTTT TTTCTTTTTG
MH884740 ---------- ---------- ---------- ---------- ----------
MH884742 ---------- ---------- -------TTT TTTAATTTTT TTCCTTTTTG
LC547467 ---------- ---------- ---------- ---------- ----------
LC547463 ---------- ---------- ---------- ---------- ----------
KF872166 -------GGG GGGAAGAAGA AAAATGTTTT TTTTTTTTTT TTTTTTTTTG
Consensus CGCTGCAGGG AGGAAGACGA AARWTGTTTT TTTHWHTTTT TTYCTTTTYG
....|....| ....|....| ....|....| ....|....| ....|....|
60 70 80 90 100
DQ779189 TTTTTCTGAT TTTTGTTTTT TTTGACTCCG GCCCAGCTGC CTCTGTCGGG
KC607824 TTTTTCTGAT TTTTGTTTTT TTTGACTCCG GCCCAGCTGC CTCTGTCGGG
DQ779191 TTTTTCTGAT TTTTGTTTTT TTTGACTCCG GCCCAGCTGC CTCTGTCGGG
KX963355 TTTTTCTGAT TTTTGTTTTT TTTGACTCCG GCCCAGCTGC CTCTGTCGGG
KX963353 TTTTTCTGAT TTTTGTTTTT TTTGACTCCG GCCCAGCTGC CTCTGTCGGG
DQ779193 TTTTTCTGAT TTTTGTTTTT TTTGACTCCG GCCCAGCTGC CTCTGTCGGG
DQ779192 CTTTTCTGAT TTTTGTTTTT TTTGACTCCG GCCCAGCTGC GTCTGTCGGG
LN714493 TTTTTCTGAT TTTTGTTTTT TTTGACTCCG GCCCAGCTGC CTCTGTCGGG
EF195646 TTTTTCTGAT TTTTGTTTTT TTTGACTCCG GCCCAGCTGC GTCTGTCGGG
LN714508 TTTTTCTGAT TTTTGTTTTT TTTGACTCCG GCCCAGCTGC CTCTGTCGGG
DQ779196 TTTTTCTGAT TTTTGTTTTT TTTGACTCCG GCCCAGCTGC CTCTGTCGGG
DQ779188 TTTTTCTGAT TTTTGTTTTT TTTGACTCCG GCCCAGCTGC CTCTGTCGGG
DQ779190 TTTTTCTGAT TTTTGTTTTT TTTGACTCCG GCCCAGCTGC CTCTGTCGGG
MG003442 TTTTTCTGAT TTTTGTTTTT TTTGACTCCG GCCCAGCTGC CTCTGTCGGG
KX781159 TTTTTTTGAT TTTTGTTTTT TTTGACTCCG GCCCAGCTGC CTCTGTCGGG
KX963354 TTTTTCTGAT TTTTGTTTTT TTTGACTCCG GCCCAGCTGC CTCTGTCGGG
DQ779195 TTTTTCTGAT TTTTG-TTTT TTTGACTGCG GCCCAGCTGC CTCTGTCGGG
DQ779187 TTTCTCTGAT TTTTGTTTTT TTTGACTCCG GCCCAGCTGC CTCTGTCGGG
DQ779194 TTTTTCTGAT TTTTG-TTTT TTTGACTCCG GCCCAGCTGC CTCTGTCGGG
EF648168 TTTTTCTGAT TTTTGTTTTT TTTGACTCCG GCCCAGCTGC CTCTGTCGGG
FJ656209 TTTTTCTGAT TTTTGTTTTT TTTGACTCCG GCCCAGCTGC CTCTGTCGGG
MH680820 TTTTTCTGAT TTTTGTTTTT TTTGACTCCG GCCCAGCTGC CTCTGTCGGG
MH884741 TTTTTCTGAT TTTTGTTTTT TTTGACTCCG GCCCAGCTGC CTCTGTCGGG
MH884737 TTTTTCTGAT TTTTGTTTTT TTTGACTCCG GCCCAGCTGC CTCTGTCGGG
EF648169 TTTTGCTGAT TTTGGTTTTT TTTGACTCCG GCCCAGCTGC CTCTGTCGAA
MH884735 TTTTTCTGAT TTTTGTTTTT TTTGACTCCG GCCCAGCTGC CTCTTTCGGG
MH884743 TTTTTTTGAT TTTTGTTTTT TTTGACTCCG GCCCAGCTGC CTCTGTCGGG
MH884748 TTTTTCTGAT TTTTGTTTTT TTTGACTCCG GCCCAGCTGC CTCTGTCGGG
MH884739 TTTTTCTGAT TTTTGTTTTT TTTGACTCCG GCCCAGCTGC CTCTTTCGGG
MH884745 TTTTTCTGAT TTTTGTTTTT TTTGACTCCG GCCCAGCTGC CTCTGTCGGG
MH884744 TTTTTCTGAT TTTTGTTTTT TTTGACTCCG GCCCAGCCGC CTCTTTCGGG
MH884736 TTTTTCCGAT TTTTGTTTTT TTTGACTCCG GCCCAGCTGC CTTTTTCGGA
MH884740 ----TCTGAT TTTTG-TTTT TTTGGCTCCG GCCCAGCTGC CTCTGTCGGG
MH884742 TTTTTCTGAT TTTTGTTTTT TTTGACTCCG GCCCAGCTGC CTCTTTCGGG
LC547467 -TTTT-TGAT TTTTGTTTTT TTTGACTCCG GCCCAGCTGC CTCTGTCGGG
LC547463 --TTT-TGAT TTTTGTTTTT TTTGACTCCG GCCCAGCTGC CTCTGTCGGG
KF872166 TTTTTTTGAT TTTTGTTTTT TTTGACTCCG GCCCAGCTGC CTTTGTCGGG
Consensus TTTTTYTGAT TTTTGTTTTT TTTGACTCCG GCCCAGCTGC STYTKTCGGR
....|....| ....|....| ....|....| ....|....| ....|....|
110 120 130 140 150
DQ779189 ATGAGACCGC GGAGCCGAAG TGCGTTTCCT TTTTTTGATT TTTTTTTGTT
KC607824 ATGAGACCGC GGAGCCGAAG TGCGTTTTCT TTTTTTGATT TTTTTTTGTT
DQ779191 ATGAGACCGC GGAGCCGAAG TGCGTTTTCT TTTTTTGA-T TTTTTTTGTT
KX963355 ATGAGACCGC GGAGCCGAAG TGCGTTTTCT TTTTTTGATT TTTTTTTGTT
KX963353 ATGAGACCGC GGAGCCGAAG TGCGTTTTCT TTTTTTGATT TTTTTTTGTT
DQ779193 ATGAGACCGC GGAGCCGAAG TGCTTTTTC- TTCTTTGATG TTTTTTTGTT
DQ779192 ATGAGACCGC GGAGCCGAAG TGCGTTTTCT TTTTTTGATT TTTTTTTGTT
LN714493 ATGAGACCGC GGAGCCGAAG TGCGTTTTCT TTTTTTGATT TTTTTTTGTT
EF195646 ATGAGACCGC GGAGCCGAAG TGCGTTTTCT TTTTTTGATT TTTTTTTGTT
LN714508 ATGAGACCGC GGAGCCGAAG TGCGTTTCCT TTTTCTGATT TTTTTTTGTT
DQ779196 ATGAGACCGC GGAGCCGAAG TGCGTTTTCT TTTTTTGATT TTTTTTTGTT
DQ779188 ATGAGACCGC GGAGCCGAAG TGCGTTTTC- TTCTTTGATG TTTTTTTGTT
DQ779190 ATGAGACCAC GGAGCCGAAG TGCGTTTTC- TTCTTTGATG TTTTTTTGTT
MG003442 ATGAGACCGC GGAGCCGAAG TGCGTTTTCT TTTTCTGATT TTTTTTTGTT
KX781159 ATGAGACCGC GGAGCCGAAG TGCGTTTTTT TTTTTTGATT TTTTTTTGTT
KX963354 ATGAGACCGC GGAGCCGAAG TGCGTTTTCT TTTTTTGATT TTTTTTTGTT
DQ779195 ATGAGACCGC GGAGCCGAAG TGCGTTTTC- TTCTTTGATT TTTTTTTGTT
DQ779187 GTGAGACCGC GGAGCCGAAG TGCGTTTTCT TTTTTTGATT TTTTTTTGTT
DQ779194 ATGAGACCGC GGAGCCGAAG TGCGTTTTCT TTTTTTGACT TTTTTTTGTT
EF648168 ATGAGACCGC GGAGCCGAAG TGCGTTTTCT TTTTTTGATT TTTTTTTGTT
FJ656209 ATGAGACCCC GGAGCCGAAG TGCGTTTTCT TTTTTTGACT TTTTTTTGTT
MH680820 ATGAGACCGC GGAGCCGAAG TGCGTTTTCT TTTTTTGATT TTTTTTTGTT
MH884741 ATGAGACCGC GGAGCCGAAG TGCGTTTTCT TTTTTTGATT TTTTTTTGTT
MH884737 ATGAGACCCC GGAGCCGAAG TGCGTTTTCT TTTTTTGATT TTTTTTTGTT
EF648169 TTGAGACCAC GGAGCCGAGG TGCGTTTTCT TTTTTTGATT TTTTTTTGTT
MH884735 ATGAGACCCC GGAGCCGAAG TGCGTTTTCT TTTTTTGATT TTTTTTTGTT
MH884743 ATGAGACCGC GGAGCCGAAG TGCGTTTTTT TTTTTTGATT TTTTTTTGTT
MH884748 ATGAGACCGC GGAGCCGAAG TGCGTTTTCT TTTTTTGATT TTTTTTTGTT
MH884739 ATGAGACCGC GGAACCGAAG TGCGTTTTCT TTTTTTGATT TTTTTTTGTT
MH884745 ATGAGACCGC GGAGCCGAAG TGCGTTTTCT TTTTTTGATT TTTTTTTGTT
MH884744 TAGAGACCCC GGACCCGAAG TGCGTTTTCT TTTTTTGATT TTTTTTTGTT
MH884736 ATGAGACCCC GGAACCGAAG TGCGTTTTTT TTTTTTGATT TTTTTTTGTT
MH884740 ATGAGACCGC GGAGCCGAAG TGCGTTTTCT TTTTTTGATT TTTTTTTGTT
MH884742 AAGAGACCGC GGAGCCGAAA GGCGTTTTCT TTTTTTGATT TTTTTTTGTT
LC547467 ATGAGACCGC GGAGCCGAAG TGCGTTTTTT TTTTTTGATT TTTTTTTGTT
LC547463 ATGAGACCGC GGAGCCGAAG TGCGTTTTTT TTTTTTGATT TTTTTTTGTT
KF872166 AAGAGACCCC GGAGCCGAAG GGCGTTTTTT TTTTTTGATT TTTTTTTGTT
Consensus DWGAGACCVC GGAVCCGAAG KGCGTTTYYT TTYTYTGAYK TTTTTTTGTT
....|....| ....|....| ....|....| ....|....| ....|....|
160 170 180 190 200
DQ779189 TTTTCACAGG CGAGCTCGCC TGTGCTTGGA GCCACAGAAG GGACAGAAGT
KC607824 TTTTCACAGG CGAGCTCGCC TGTGCTTGGA GCCACAGAAG GGACAGAAGT
DQ779191 TTTTCACAGG CGAGCTCGCC TGTGCTTGGA GCCACAGAAG GGCCAGAAGT
KX963355 TTTTCACAGG CGAGCTCGCC TGTGCTTGGA GCCACAGAAG GGACAGAAGT
KX963353 TTTTCACAGG CGAGCTCGCC TGTGCTTGGA GCCACAGAAG GGACAGAAGT
DQ779193 TTTTCACAGG CGAGCTCGCC TGTGCTTGGA GCCACAGAAG GGACAGAAGT
DQ779192 TTTTCACAGG CGAGCTCGCC TGTGCTTGGA GCCACAGAAG GGACAGAAGT
LN714493 TTTTCACAGG CGAGCTCGCC TGTGCTTGGA GCCACAGAAG GGACAGAAGT
EF195646 TTTTCACAGA CGAGCTCGCC TGTGCTTGGA GCCACAGAAG GGACAGAAGT
LN714508 TTTTCACAGG CGAGCTCGCC TGTGCTTGGA GCCACAGAAG GGACAGAAGT
DQ779196 TTTTCACAGG CGAGCTCGCC TGTGCTTGGA GCCACAGAAG GGACAGAAGT
DQ779188 TTTTCACAGG CGAGCTCGCC TGTGCTTGGA GCCACAGAAG GGACAGAAGT
DQ779190 TTTTCACTGG CGAGCTCGCC TGTGCTTGGA GCCACAGAAG GGACAGAAGT
MG003442 TTTTCACAGG CGAGCTCGCC TGTGCTTGGA GCCACAGAAG GGACAGAAGT
KX781159 TTTTCACAGG CGAGCTCGCC TGTGCTTGGA GCCACAGAAG GGACAGAAGT
KX963354 TTTTCACAGG CGAGCTCGCC TGTGCTTGGA GCCACAGAAG GGACAGAAGT
DQ779195 TTTTCACAGG CGAGCTCGCC TGTGCTTGGA GCCACAGAAG GGACAGAAGT
DQ779187 TTTTCACAGG CGAGCTCGCC TGTGCTTGGA GCCACAGAAG GGACAGAAGT
DQ779194 TTTTCACAGG CGAGCTCGCC TGTGCTTGGA GCCACAGAAG GGACAGAAGT
EF648168 TTTTCACAGG CGAGCTCGCC TGTGCTTGGA GCCACAGAAG GGACAGAAGT
FJ656209 TTTTCACAGG CGAGCTCGCC TGTGCTTGGA GCCACAGAAG GGACAGAAGT
MH680820 TTTTCACAGG CGAGCTCGCC TGTGCTTGGA GCCACAGAAG GGACAGAAGT
MH884741 TTTTCACAGG CGAGCTCGCC TGGGCTTGGA GCCACAGAAG GGACAGAAGT
MH884737 TTTTCACAGG CGAGCTCGCC TGTGCTTGGA GCCACAGAAG GGACAGAAGT
EF648169 TTTTCACAGG CGAGCTCGCC TGTGCTTGGA GCCACAGAAG GGACAGAAGT
MH884735 TTTTCACAGG CGAGCTCGCC TGTGCTTGGA GCCACAGAAG GGACAGAAGT
MH884743 TTTTCACAGG CGAGCTCGCC TGTGCTTGGA GCCACAGAAG GGACAGAAGT
MH884748 TTTCCACAGG CGAGCTCGCC TGTGCTTGGA GCCACAGAAG GGACAAAAGT
MH884739 TTTTCACAGG CGAGCTCGCC TGTGCTTGGA GCCACAGAAG GGACAGAAGT
MH884745 TTTTCACAGG CGAGCTCGCC TGTGCTTGGA GCCACAGAAG GGACAGAAGT
MH884744 TTTTCACAGG CGAGCTCCCC TGTGCTTGGA GCCACAGAAG GGACAGAAGT
MH884736 TTTTCACAGG CGAGCTCCCC TGTGCTTGGA GCCACAGAAG GGACAGAAGT
MH884740 TTTTCACAGG CGAGCTCGCC TGTGCTTGGA GCCACAGAAG GGACAGAAGT
MH884742 TTTTCCCAGG CGAGCTCCAC TGTGCTTGGA ACCCCAGAAG GGACAGAAGT
LC547467 TTTTCACAGG CGAGCTCGCC TGTGCTTGGA GCCACAGAAG GGACAGAAGT
LC547463 TTTTCACAGG CGAGCTCGCC TGTGCTTGGA GCCACAGAAG GGACAGAAGT
KF872166 TTTTCACAGG CGAGCTCGCC TGTGCTTGGA GCCACAGAAG GGACAGAAGT
Consensus TTTTCACAGG CGAGCTCSCC TGTGCTTGGA GCCACAGAAG GGACAGAAGT
....|....| ....|....| ....|....| ....|....| ....|....|
210 220 230 240 250
DQ779189 CGAAGGGGAC TACAGACGCG ATGCCGCTCC TCCAGCCGTC TTGGAGGAGA
KC607824 CGAAGGGGAC TACAGACGCG ATGCCGCTCC TCCAGCCGTC TTGGAGGAGA
DQ779191 CGAAGGGGAC TACGGACGCG ATGCCGCTCC TCCAGCCGTC TTGGAGGAGA
KX963355 CGAAGGGGAC TACAGACGCG ATGCCGCTCC TCCAGCCGTC TTGGAGGAGA
KX963353 CGAAGGGGAC TACAGACGCG ATGCCGCTCC TCCAGCCGTC TTGGAGGAGA
DQ779193 CGAAGGGGAC TACAGACGCG ATGCCGCTCC TCCAGCCGTC TTGGAGGAGA
DQ779192 CGAAGGGGAC TACAGACGCG ATGCCGCTCC TCCAGCCGTC TTGGAGGAGA
LN714493 CGAAGGGGAC TACAGACGCG ATGCCGCTCC TCCAGCCGTC TTGGAGGAGA
EF195646 CGAAGGGGAC TACAGACGCG ATGCCGCTCC TCCAGCCGTC TTGGAGGAGA
LN714508 CGAAGGGGAC TACAGACGCG ATGCCGCTCC TCCAGCCGTC TTGGAGGAGA
DQ779196 CGAAGGGGAC TACAGACGCG ATGCCGCTCC TCCAGCCGTC TTGGAGGAGA
DQ779188 CGAAGGGGAC TACAGACGCG ATGCCGCTCC TCCAGCCGTC TTGGAGGAGA
DQ779190 CGAAGGGGAC TACAGACGCG ATGCCGCTCC TCCAGCCGTC TTGGAGGAGA
MG003442 CGAAGGGGAC TACAGACGCG ATGCCGCTCC TCCAGCCGTC TTAGAGCAGA
KX781159 CGAAGGGGAC TACAGACGCG ATGCCGCTCC TCCAGCCGTC TTGGAGGAGA
KX963354 CGAAGGGGAC TACAGACGCG ATGCCGCTCC TCCAGCCGTC TTGGAGGAGA
DQ779195 CGAAGGGGAC TACAGACGCG ATGCCGCTCC TCCAGCCGTC TTGGAGGAGA
DQ779187 CGAAGGGGAC TACAGACGCG ATGCCGCTCC TCCAGCCGTC TTGGAGGAGA
DQ779194 CGAAGGGGAC TACAGACGCG ATGCCGCTCC TCCAGCCGTC TTGGAGGAGA
EF648168 CGAAGGGGAC TACAGACGCG ATGCCGCTCC TCCAGCCGTC TTGGAGGAGA
FJ656209 CGAAGGGGAC TACAGACGCG ATGCCGCTCC TCCAGCCGTC TTGGAGGAGA
MH680820 CGAAGGGGAC TACAGACGCG ATGCCGCTCC TCCAGCCGTC TTGGAGGAGA
MH884741 CGAAGGGGAC TACAGACGCG ATGCCGCTCC TCCAGCCGTC TTGGAGGAGA
MH884737 CGAAGGGGAC TACAGACGCG ATGCCGCTCC TCCAGCCGTC TTGGAGGAGA
EF648169 CGAAGGGGAC TACAGACGCG ATGCCGCTCC TCCAGCCGTC TTGGAGGAGA
MH884735 CGAAGGGGAC TACAGACGCG ATGCCGCTCC TCCAGCCGTC TTGGAGGAGA
MH884743 CGAAGGGGAC TCCAGACGCG ATGCCGCTCC TCCAGCCGTC TTGGAGGAGA
MH884748 CGAGGGGGAC TACAGACGCG ATGCCGCTCC TCCCACCGTC TTGGAGGAGA
MH884739 CGAAGGGGAC TACAGACGCG ATGCCGCTCC TCCAGCCGTC TTGGAGGAGA
MH884745 CGAAGGGGAC TACAGACGCG ATGCCGCTCC TCCAGCCGTT TTGGAGGAGA
MH884744 CGAAGGGGAC TACAGACGCG ATGCCGCTCC TCCACCCGTC TTGGAGGAGA
MH884736 CGAAGGGGAC TACAGACGCG ATGCCGCTCC TCCAGCCGTC TTGGAGGAGA
MH884740 CGAAGGGGAC TACAGACGCG ATGCCGCTCC TCCAGCCGTC TTGGAGGAGA
MH884742 GGAAGGGGAC TACAGACGCG ATGCCCCTCC TCCAGCCGTC TTGGAGGAGA
LC547467 CGAAGGGGAC TACAGACGCG ATGCCGCTCC TCCAGCCGTC TTGGAGGAGA
LC547463 CGAAGGGGAC TACAGACGCG ATGCCGCTCC TCCAGCCGTC TTGGAGGAGA
KF872166 CGAAGGGGAC TACAGACGCG ATGCCGCTCC TCCAGCCGTC TTGGAGGAGA
Consensus CGAAGGGGAC TACAGACGCG ATGCCGCTCC TCCAVCCGTC TTGGAGGAGA
TG-F
....|....| ....|....| ....|....| ....|....| ....|....|
260 270 280 290 300
DQ779189 GATATCAGGA CTGTAGATGA AGGCGACGGT GAGGATGAGG GGGTGGCGTG
KC607824 GATATCAGGA CTGTAGATGA AGGCGAGGGT GAGGATGAGG GGGTGGCGTG
DQ779191 GATATCAGGA CTGTAGATGA AGGCGACGGT GAGGATGAGG GGGTGGCGTG
KX963355 GATATCAGGA CTGTAGATGA AGGCGAGGGT GAGGATGAGG GGGTGGCGTG
KX963353 GATATCAGGA CTGTAGATGA AGGCGAGGGT GAGGATGAGG GGGTGGCGTG
DQ779193 GATATCAGGA CTGTAGATGA AGGCGACGGT GAGGATGAGG GGGTGGCGTG
DQ779192 GATATCAGGA CTGTAGATGA AGGCGAGGGT GAGGATGAGG GGGTGGCGTG
LN714493 GCTATCAGGA CTGTAGATGA AGGCGACGGT GAGGATGAGG GGGTGGCGTG
EF195646 GATATCAGGA CTGTAGATGA AGGCGAGGGT GAGGATGAGG GGGTGGCGTG
LN714508 GATATCAGGA CTGTAGATGA AGGCGAGGGT GAGGATGAGG GGGTGGCGTG
DQ779196 GATATCAGGA CTGTAGATGG AGGCGAGGAT GAGGATGTGA GGGTGGCGTG
DQ779188 GATATCAGGA CTGTAGATGA AGGCGACGGT GAGGATGAGG GGGTGGCGTG
DQ779190 GATATCAGGA CTGTAGATGA AGGCGAGGGT GAGGATGAGG GGGTGGCGTG
MG003442 GACATCAGGA CTGTAGATGA AGGCGAGGGT GAGGATGAGG GGGTGGCGTG
KX781159 GATATCAGGA CTGTAGATGA AGGCGACGGT GAGGATGAGG GGGTGGCGTG
KX963354 GATATCAGGA CTGTAGATGG AGGCGAGGAT GAGGATGTGA GGGTGGCGTG
DQ779195 GATATCAGGA CTGTAGATGA AGGCGAGGGT GAGGATGAGG GGGTGGCGTG
DQ779187 GATATCAGGA CTGTAGATGG AGGCGAGGAT GAGGATGAGA GGGTGGCGTG
DQ779194 GATATCAGGA CTGTAGATGA AGGTGAGGGT GAGGATGAGG GGGTGGCGTG
EF648168 GATATCAGGA CTGTAGATGA AGGCGACGGT GAGGATGAGG GGGTGGCGTG
FJ656209 GATATCAGGA CTGTAGATGA AGGCGAGGGT GAGGATGAGG GGGTGGCGTG
MH680820 GATATCAGGA CTGTAGATGA AGGCGAGGGT GAGGATGAGG GGGTGGCGTG
MH884741 GATATCAGGA CTGTAGATGA AGGCGAGGGT GAGGATGAGG GGGTGGCGTG
MH884737 GATATCAGGA CTGTAGATGA AGGCGAGGGT GAGGATGAGG GGGTGGCGTG
EF648169 GATATCAGGA CTGTAGATGA AGGCGACGGT GAGGATGAGG GGGTGGCGTG
MH884735 GATATCAGGA CTGTAGATGA AGGCGAGGGT GAGGATGAGG GGGTGGCGTG
MH884743 GATATCAGGA CTGTAGATGA AGGCGAGGGT GAGGATGAGG GGGTGGCGTG
MH884748 GATATCAGGA CTGTAGATGA AGGCGAGGGT GAGGATGAGG GGGTGGCGTG
MH884739 GATATCAGGA CTGTAGATGA AGGCGAGGGT GAGGATGAGG GGGTGGCGTG
MH884745 GATATCAGGA CTGTAGATGA AGGCGAGGGT GAGGATGAGG GGGTGGCGTG
MH884744 GATATCAGGA CTGTAGATGA AGGCGACGGT GAGGATGAGG GGGTGGCGTG
MH884736 GATATCAGGA CTGTAGATGA AGGCGAGGGT GAGGATGAGG GGGTGGCGTG
MH884740 GATATCAGGA CTGTAGATGA AGGCGAGGGT GAGGATGAGG GGGTGGCGTG
MH884742 GATATCAGGA CTGTAGATGA AGGCGAGGGT GAGGATGAGG GGGTGGCGTG
LC547467 GATATCAGGA CTGTAGATGA AGGCGAGGGT GAGGATGAGG GGGTGGCGTG
LC547463 GATATCAGGA CTGTAGATGA AGGCGAGGGT GAGGATGAGG GGGTGGCGTG
KF872166 GATATCAGGA CTGTAGATGA AGGCGAGGGT GAGGATGAGG GGGTGGCGTG
Consensus GATATCAGGA CTGTAGATGR AGGCGASGRT GAGGATGWGR GGGTGGCGTG
....|....| ....|....| ....|....| ....|....| ....|....|
310 320 330 340 350
DQ779189 GTTGGGAAGC GACGAGAGTC GGAGAGGGAG AAGATGTTTC CGGCTTGGCT
KC607824 GTTGGGAAGC GACGAGAGTC GGAGAGGGAG AAGATGTTTC CGGCTTGGCT
DQ779191 GTTGGGAAGC GACGAGAGTC GGAGAGGGAG AAGATGTTTC CGGCTTGGCT
KX963355 GTTGGGAAGC GACGAGAGTC GGAGAGGGAG AAGATGTTTC CGGCTTGGCT
KX963353 GTTGGGAAGC GACGAGAGTC GGAGAGGGAG AAGATGTTTC CGGCTTGGCT
DQ779193 GTTGGGAAGC GACGAGAGTC GGAGAGGGAG AAGATGTTTC CGGCTTGGCT
DQ779192 GTTGGGAAGC GACGAGAGTC GGAGAGGGAG AAGATGTTTC CGGCTTGGCT
LN714493 GTTGGGAAGC GACGAGAGTC GGAGAGGGAG AAGATGTTTC CGGCTTGGCT
EF195646 GTTGGGAAGC GACGAGAGTC GGAGAGGGAG AAGATGTTTC CGGCTTGGCT
LN714508 GTTGGGAAGC GACGAGAGTC GGAGAGGGAG AAGATGTTTC CGGCTTGGCT
DQ779196 GTTGGGAAGC GGCGAGAGTC GGAGAGGGAG AAGATGTTTC CGGCTTGGCT
DQ779188 GTTGGGAAGC GACGAGAGTC GGAGAGGGAG AAGATGTTTC CGGCTTGGCT
DQ779190 GTTGGGAAGC GACGAGAGTC GGAGAGGGAG AAGATGTTTC CGGCTTGGCT
MG003442 GTTGGGAAGC GACGAGAGTC GGAGAGGGAG AAGATGTTTC CGGCTTGGCT
KX781159 GTTGGGAAGC GACGAGAGTC GGAGAGGGAG AAGATGTTTC CGGCTTGGCT
KX963354 GTTGGGAAGC GGCGAGAGTC GGAGAGGGAG AAGATGTTTC CGGCTTGGCT
DQ779195 GTTGGGAAGC GACGAGAGTC GGAGAGGGAG AAGATGTTTC CGGCTTGGCT
DQ779187 GTTGGGAAGC GACGAGAGTC GGAGAGGGAG AAGATGTTTC CGGCTTGGCT
DQ779194 GTTGGGAGGC GACGAGAGTC GGAGAGGGAG AAGATGTTTC CGGCTTGGCT
EF648168 GTTGGGAAGC GACGAGAGTC GGAGAGGGAG AAGATGTTTC CGGCTTGGCT
FJ656209 GTTGGGAAGC GACGAGAGTC GGAGAGGGAG AAGATGTTTC CGGCTTGGCT
MH680820 GTTGGGAAGC GACGAGAGTC GGAGAGGGAG AAGATGTTTC CGGCTTGGCT
MH884741 GTTGGGAAGC GACGAGAGTC GGAGAGGGAG AAGATGTTTC CGGCTTGGCT
MH884737 GTTGGGAAGC GACGAGAGTC GGAGAGGGAG AAGATGTTTC CGGCTTGGCT
EF648169 GTTGGGAAGC GACGAGAGTC GGAGAGGGAG AAGATGTTTC CGGCTTGGCT
MH884735 GTTGGGAAGC GACGAGAGTC GGAGAGGGAG AAGATGTTTC CGGCTTGGCT
MH884743 GTTGGGAAGC GACGAGAGTC GGAGAGGGAG AAGATGTTTC CGGCTTGGCT
MH884748 GTTGGGAAGC GACGAGAGTC GGAGAGGAAG AAGATGTTTC CGGTCTGGCT
MH884739 GTTGGGAAGC GACGAGAGTC GGAGAGGGAG AAGATGTTTC CGGCTTGGCT
MH884745 GTTGGGAAGC GACGAGAGTC GGAGAGGGAG AAGATGTTTC CGGCTTGGCT
MH884744 GTTGGGAAGC GACGAGAGTC GGAGAGGGAG AAGATGTTTC CGGCTTGGCT
MH884736 GTTGGGAAGC GACGAGAGTC GGAGAGGGAG AAGATGTTTC CGGCTTGGCT
MH884740 GTTGGGAAGC GACGAGAGTC GGAGAGGGAG AAGATGTTTC CGGCTTGGCT
MH884742 GTTGGGAAGC GACGAGAGTC GGAGAGGGAG AAGATGTTTC CGGCTTGGCT
LC547467 GTTGGGAAGC GACGAGAGTC GGAGAGGGAG AAGATGTTTC CGGCTTGGCT
LC547463 GTTGGGAAGC GACGAGAGTC GGAGAGGGAG AAGATGTTTC CGGCTTGGCT
KF872166 GTTGGGAAGC GACGAGAGTC GGAGAGGGAG AAGATGTTTC CGGCTTGGCT
Consensus GTTGGGAAGC GRCGAGAGTC GGAGAGGGAG AAGATGTTTC CGGCTTGGCT
....|....| ....|....| ....|....| ....|....| ....|....|
360 370 380 390 400
DQ779189 GCTTTTCCTG GAGGGTGGAA AAGAGACACC GGAATGCGAT CTAGACGAGA
KC607824 GCTTTTCCTG GAGGGTGGAA AAGAGACACC GGAATGCGAT CTAGACGAGA
DQ779191 GCGTTTCCTG GAGGGTGGAA AAGAGACACC GGAATGCGAT CTAGACGAGA
KX963355 GCTTTTCCTG GAGGGTGGAA AAGAGACACC GGAATGCGAT CTAGACGAGA
KX963353 GCTTTTCCTG GAGGGTGGAA AAGAGACACC GGAATGCGAT CTAGACGAGA
DQ779193 GCTTTTCCTG GAGGGTGGAA AAGAGACACC GGAATGCGAT CTAGACGAGA
DQ779192 GCTTTTCCTG GAGGGTGGAA AAGAGACACC GGAATGCGAT CTAGACGAGA
LN714493 GCTTTTCCTG GAGGGTGGAA AAGAGACACC GGAATGCGAT CTAGACGAGA
EF195646 GCTTTTCCTG GAGGGTGGAA AAGAGACACC GGAATGCGAT CTAGACGAGA
LN714508 GCTTTTCCTG GAGGGTGGAA AAGAGACACC GGAATGCGAT CTAGACGAGA
DQ779196 GCTTTTCCTG GAGGGTGGAA AAGAGACACC GGAATGCGAT CTAGACGAGA
DQ779188 GCTTTTCCTG GAGGGTGGAA AAGAGACACC GGAATGCGAT CTAGACGAGA
DQ779190 GCTTTTCCTG GAGGGTGGAA AAGAGACACC GGAATGCGAT CTAGACGAGA
MG003442 GCTTTTCCTG GAGGGTGGAA AAGAGACACC GGAATGCGAT CTAGACGAGA
KX781159 GCTTTTCCTG GAGGGTGGAA AAGAGACACC GGAATGCGAT CTAGACGAGA
KX963354 GCTTTTCCTG GAGGGTGGAA AAGAGACACC GGAATGCGAT CTAGACGAGA
DQ779195 GCTTTTCCTG GAGGGTGGAA AAGAGACACC GGAATGCGAT CTAGACGAGA
DQ779187 GCTTTTCCTG AAGGGTGGAA AAGAGACACC GGAATGCGAT CTAGACGAGA
DQ779194 GCATTTCCTG GAGGGCGGAA AAGAGACACC GGAATGCGAT CTAGACGAGA
EF648168 GCTTTTCCTG GAGGGTGGAA AAGAGACACC GGAATGCGAT CTAGACGAGA
FJ656209 GCTTTTCCTG GAGGGTGGAA AAGAGACACC GGAATGCGAT CTAGACGAGA
MH680820 GCTTTTCCTG GAGGGTGGAA AAGAGACACC GGAATGCGAT CTAGACGAGA
MH884741 GCTTTTCCTG GAGGGTGGAA AAGAGACACC GGAATGCGAT CTAGACGAGA
MH884737 GCTTTTCCTG GAGGGTGGAA AAGAGACACC GGAATGCGAT CTAGACGAGA
EF648169 GCTTTTCCTG GAGGGTGGAA AAGAGACACC GGAATGCGAT CTAGACGAGA
MH884735 GCTTTTCCTG GAGGGTGGAA AAGAGACACC GGAATGCGAT CTAGACGAGA
MH884743 GCTTTTCCTG GAGGGTGGAA AAGAGACACC GGAATGCGAT CTAGACGAGA
MH884748 GCTTTTCCTG GAGGGTGAAA AAGAGACACC GGAATGCGAT CTAGACGAGA
MH884739 GCTTTTCCTG GAGGGTGGAA AAGAGACACC GGAATGCGAT CTAGACGAGA
MH884745 GCTTTTCCTG GAGGGTGGAA AAGAGACACC GGAATGCGAT CTAGACGAGA
MH884744 GCTTTTCCTG GAGGGTGGAA AAGAGACACC GGAATGCGAT CTAGACGAGA
MH884736 GCTTTTCCTG GAGGGTGGAA AAGAGACACC GGAATGCGAT CTAGACGAGA
MH884740 GCTTTTCCTG GAGGGTGGAA AAGAGACACC GGAATGCGAT CTAGACGAGA
MH884742 GCTTTTCCTG GAGGGTGGAA AAGAGACACC GGAATGCGAT CTAGACGAGA
LC547467 GCTTTTCCTG GAGGGTGGAA AAGAGACACC GGAATGCGAT CTAGACGAGA
LC547463 GCTTTTCCTG GAGGGTGGAA AAGAGACACC GGAATGCGAT CTAGACGAGA
KF872166 GCTTTTCCTG GAGGGTGGAA AAGAGACACC GGAATGCGAT CTAGACGAGA
Consensus GCDTTTCCTG GAGGGTGGAA AAGAGACACC GGAATGCGAT CTAGACGAGA
TG-Probe
....|....| ....|....| ....|....| ....|....| ....|....|
410 420 430 440 450
DQ779189 CGACGCTTTC CTCGTGGTGA TGGCGGAGAG AATTGAAGAG TGGAGAAGAG
KC607824 CGACGCTTTC CTCGTGGTGA TGGCGGAGAG AATTGAAGAG TGGAGAAGAG
DQ779191 CGACGCTTTC CTCGTGGTGA TGGCGGAGAG AATTGAAGAG TGGAGAAGAG
KX963355 CGACGCTTTC CTCGTGGTGA TGGCGGAGAG AATTGAAGAG TGGAGAAGAG
KX963353 CGACGCTTTC CTCGTGGTGA TGGCGGAGAG AATTGAAGAG TGGAGAAGAG
DQ779193 CGACGCTTTC CTCGTGGTGA TGGCGGAGAG AATTGAAGAG TGGAGAAGAG
DQ779192 CGACGCTTTC CTCGTGGTGA TGGCGGAGAG AATTGAAGAG TGGAGAAGAG
LN714493 CGACGCTTTC CTCGTGGTGA TGGCGGAGAG AATTGAAGAG TGGAGAAGAG
EF195646 CGACGCTTTC CTCGTGGTGA TGGCGGAGAG AATTGAAGAG TGGAGAAGAG
LN714508 CGACGCTTTC CTCGTGGTGA TGGCGGAGAG AATTGAAGAG TGGAGAAGAG
DQ779196 CGACGCTTTC CTCGTGGTGA TGGCGGAGAG AATTGAAGAG TGGAGAAGAG
DQ779188 CGAAGCTTTC CTCGTGGTGA TGGCGGAGGG AATTGAAGAG TGGAGAAGAG
DQ779190 CGACGCTTTC CTCGTGGTGA TGGCGGAGAG AATTGAAGAG TGGAGAAGAG
MG003442 CGACGCTTTC CTCGTGGTGA TAGCGGAGAG AATTGAAGAG TGGAGAAGAG
KX781159 CGACGCTTTC CTCGTGGTGA TGGCGGAGAG AATTGAAGAG TGGAGAAGAG
KX963354 CGACGCTTTC CTCGTGGTGA TGGCGGAGAG AATTGAAGAG TGGAGAAGAG
DQ779195 CGACGCTTTC CTCGTGGTGA TGGCGGAGAG AATTGAAGAG GGGAGAAGAG
DQ779187 CGACGCTTTC CTCGTGGTGA TGGCGGAGAG AATTGAAGAG TGGAGAAGAA
DQ779194 CGACGCTTTC CTCGTGGTGA TGGCGGAGAG AATTGAAGAG TGGGGAAGAG
EF648168 CGACGCTTTC CTCGTGGTGA TGGCGGAGAG AATTGAAGAG TGGAGAAGAG
FJ656209 CGACGCTTTC CTCGTGGTGA TGGCGGAGAG AATTGAAGAG TGGAGAAGAG
MH680820 CGACGCTTTC CTCGTGGTGA TGGCGGAGAG AATTGAAGAG TGGAGAAGAG
MH884741 CGACGCTTTC CTCGTGGTGA TGGCGGAGAG AATTGAAGAG TGGAGAAGAG
MH884737 CGACGCTTTC CTCGTGGTGA TGGCGGAGAG AATTGAAGAG TGGAGAAGAG
EF648169 CGACGCTTTC CTCGTGGTGA TGGCGGAGAG AATTGAAGAG TGGAGAAGAG
MH884735 CGACGCTTTC CTCGTGGTGA TGGCGGAGAG AATTGAAGAG TGGAGAAGAG
MH884743 CGACGCTTTC CTCGTGGTGA TGGCGGAGAG AATTGAAGAG TGGAGAAGAG
MH884748 CGACGCTTTC CTCGTGGTGA TGGCGGAGAG AATTGAAGAG TGGAGAAGAG
MH884739 CGACGCTTTC CTCGTGGTGA TGGCGGAGAG AATTGAAGAG TGGAGAAGAG
MH884745 CGACGCTTTC CTCGTGGTGA TGGCGGAGAG AATTGAAGAG TGGAGAAGAG
MH884744 CGACGCTTTC CTCGTGGTGA TGGCGGAGAG AATTGAAGAG TGGAGAAGAG
MH884736 CGACGCTTTC CTCGTGGTGA TGGCGGAGAG AATTGAAGAG TGGAGAAGAG
MH884740 CGACGCTTTC CTCGTGGTGA TGGCGGAGAG AATTGAAGAG TGGAGAAGAG
MH884742 CGACGCTTTC CTCGTGGTGA TGGCGGAGAG AATTGAAGAG TGGAGAAGAG
LC547467 CGACGCTTTC CTCGTGGTGA TGGCGGAGAG AATTGAAGAG TGGAGAAGAG
LC547463 CGACGCTTTC CTCGTGGTGA TGGCGGAGAG AATTGAAGAG TGGAGAAGAG
KF872166 CGACGCTTTC CTCGTGGTGA TGGCGGAGAG AAT-GAAGA- TG-AGAACAG
Consensus CGACGCTTTC CTCGTGGTGA TGGCGGAGAG AATTGAAGAG TGGAGAAGAG
TG-R
....|....| ....|....| ....|....| ....|....| ....|....|
460 470 480 490 500
DQ779189 GGCGAGGGAG ACAGAGTCGG AGGCTTGGAC GAAGGGAGGA GGAGGCGTAG
KC607824 GGCGAGGGAG ACAGAGTCGG AGGCTTGGAC GAAGGGAGGA GGAGGCGTAG
DQ779191 GGCGAGGGAG ACAGAGTCGG AGGCTTGGAC GAAGGGAGGA GGAGGCGTAG
KX963355 GGCGAGGGAG ACAGAGTCGG AGGCTTGGAC GAAGGGAGGA GGAGGCGTAG
KX963353 GGCGAGGGAG ACAGAGTCGG AGGCTTGGAC GAAGGGAGGA GGAGGCGTAG
DQ779193 GGCGAGGGAG ACAGAGTCGG AGGCTTGGAC GAAGGGAGGA GGAGGCGTAG
DQ779192 GGCGAGGGAG ACAGAGTCGG AGACTTGGAC GAAGGGAGGA GGAGGCGTAG
LN714493 GGCGAGGGAG ACAGAGTCGG AGGTTTGGAC GAAGGGAGGA GGAGGCGTAG
EF195646 GGCGAGGGAG ACAGAGTCGG AGGCTTGGAC GAAGGGAGGA GGAGGCGTAG
LN714508 GGCGAGGGAG ACAGAGTCGG AGGTTTGGAT GAAGGGAGGA GGAGGTGTAG
DQ779196 GGCGAGGGAG ACAGAGTCGG AGGCTTGGAC GAAGGGAGGA GGAGGCGTAG
DQ779188 GGCGAGGGAG ACAGAGTCGG AGGCTTGGAC GAAGGGAGGA GGAGGCGTAG
DQ779190 GGCGAGGGAG ACAGAGTCGG AGGCTTGGAC GAAGGGAGGA GGAGGCGTAG
MG003442 GGCGAGGGAG ACAGAGTCGG AGGTTTGGAC GAAGGGAGGA GGAGGCGTAG
KX781159 GGCGAGGGAG ACAGAGTCGG AGGCTTGGAC GAAGGAGGGA GGAAGAGTAG
KX963354 GGCGAGGGAG ACAGAGTCGG AGGCTTGGAC GAAGGGAGGA GGAGGCGTAG
DQ779195 GGCGAGGGAG ACAGAGTCGG AGGCTTGGAC GAAGGGAGGA GGAGGCGTAG
DQ779187 GGCGAGGGAG ACAGAGTCCG AGGCTTGGAC GAAGGGAGGA GGAGGCGTAG
DQ779194 GGCGAGGGAG ACAGAGTCGG AGGCTTGGAC GAAGGGAGGA GGAGGCGTAG
EF648168 GGCGAGGGAG ACAGAGTCGG AGGCTTGGAC GAAGGGAGGA GGAGGCGTAG
FJ656209 GGCGAGGGAG ACAGAGTCGG AGGCTTGGAC GAAGGGAGGA GGAGGCGTAG
MH680820 GGCGAGGGAG ACAGAGTCGG AGGCTT---- ---------- ----------
MH884741 GGCGAGGGAG ACAGAGTCGG AGGCTTGGAC GAAGGGAGGA GGAGGCGTA-
MH884737 GGCGAGGGAG ACAGAGTCGG AGGCTTGGAC GAAGGGAGGA G---------
EF648169 GGCGAGGGAG ACAGAGTCGG AGGCTTGGAC GAAGGGAGGA GGAGGCGTAG
MH884735 GGCGAGGGAG ACAGAGTCGG AGGCTTGGAC GAAGGGAG-- ----------
MH884743 GGCGAGGGAG ACAGAGTCGG AGGCTTGGAC G--------- ----------
MH884748 GGCGAGGGAG ACAGAGTCGG AGGTCTGGAC GAAGGGAGGA GGAGGCGTAA
MH884739 GGCGAGGGAG ACAGAGTCGG AGGCTTGGAC GAAGCAAGGA G---------
MH884745 GGCGAGGGAG ACAGAGTCGG AGGCT----- ---------- ----------
MH884744 GGCGAGGGAG ACAGAGTCGG AGGCTAGGAC GAAG------ ----------
MH884736 GGCGAGGGAG ACAGAGTCGG AGGCTTGGAC GAAGGGAG-- ----------
MH884740 GGCGAGGGAG ACAGAGTCGG AGGCTTGGAC GAAG------ ----------
MH884742 GGCGAGGGAG ACAGAGTCGG AGGCTTGGAC GAAGG----- ----------
LC547467 GGCGAGGGAG ACAGAGTCGG AGG------- ---------- ----------
LC547463 GGCGAGGGAG ACAGAGTCGG AGG------- ---------- ----------
KF872166 ---------- ---------- ---------- ---------- ----------
Consensus GGCGAGGGAG ACAGAGTCGG AGGYTTGGAC GAAGGRAGGA GGAGGHGTAG
....|....| ....|....| ....|....| ..
510 520 530
DQ779189 GAGAGGAATC CAGATGCACT GTGTCTGCAG CG
KC607824 GAGAGGAATC CAGATGCACT GTGTCTGCAG CG
DQ779191 GAGAGGAATC CAGATGCACT GTGTCTGCAG CG
KX963355 GAGAGGAATC CAGATGCACT GTGTCTGCA- --
KX963353 GAGAGGAATC CAGATGCACT GTGTCTGCA- --
DQ779193 GAGAGGAATC CAGATGCACT GTGTCTGCAG CG
DQ779192 GAGAGGAATC CAGATGCACT GTGTCTGCAG CG
LN714493 GAGAGGAATC CAGATGCACT GTTTCTGCAG --
EF195646 GAGAGGAATC CAGATGCACT GTGTCTGCAG --
LN714508 GAGAGGAATC CAGATGCACT GTGTCTGCAG --
DQ779196 GAGAGGAATC CAGATGCACT GTGTCTGCAG CG
DQ779188 GAGAGGAATC CAGATGCACT GTGTCTGCAG CG
DQ779190 GAGAGGAATC CAGATGCACT GTGTCTGCAG CG
MG003442 GAGAGGAATC CAGATGCACT GTGTCTGCAG CG
KX781159 GAAAGGAATC CAGATGCACT GTGTCTGCAG --
KX963354 GAGAGGAATC CAGATGCACT GTGTCTGCA- --
DQ779195 GAGAGGAATC CAGATGCACT GTGTCTGCAG CG
DQ779187 GAGAGGAATC CAGATGCACT GTGTCTGCAG CG
DQ779194 GAGAGGAATC CAGATGCACT GTGTCTGCAG CG
EF648168 GAGAGG---- ---------- ---------- --
FJ656209 GAGAGGAATC CAGATGCACT GTGTCTGCAG --
MH680820 ---------- ---------- ---------- --
MH884741 ---------- ---------- ---------- --
MH884737 ---------- ---------- ---------- --
EF648169 GAGAGG---- ---------- ---------- --
MH884735 ---------- ---------- ---------- --
MH884743 ---------- ---------- ---------- --
MH884748 GAAAGGAATC CAAATGCACT G--------- --
MH884739 ---------- ---------- ---------- --
MH884745 ---------- ---------- ---------- --
MH884744 ---------- ---------- ---------- --
MH884736 ---------- ---------- ---------- --
MH884740 ---------- ---------- ---------- --
MH884742 ---------- ---------- ---------- --
LC547467 ---------- ---------- ---------- --
LC547463 ---------- ---------- ---------- --
KF872166 ---------- ---------- ---------- --
Consensus GARAGGAATC CAGATGCACT GTGTCTGCAG CG
