# Supplementary material for: Detection of Pneumocystis jirovecii and Toxoplasma gondii in patients with lung infections by a duplex qPCR assay
Source: PLoS Negl Trop Dis. 2021 Dec 17;15(12):e0010025. doi: 10.1371/journal.pntd.0010025 (PMC8682901; doi:10.1371/journal.pntd.0010025)
Supplement: S4 Table — (XLSX) [file pntd.0010025.s004.xlsx]

## Sheet: Sheet1
S4 Table. Precision of intra and inter-assay of mtSSU and Rep-529-based qPCR assay
Sample	Gene	N	Intra-assay			N	Inter-assay
ID			Mean Cq	SD	CV (%)		Mean Ct	SD	CV (%)
1	mtSSU	20	23.99	0.45	1.87	20	24.28	0.45	1.84
	Rep-529	20	21.16	0.11	0.54	20	21.44	0.16	0.75
2	mtSSU	20	30.3	0.61	2.01	20	31.24	0.81	2.59
	Rep-529	20	27.04	0.17	0.64	20	26.98	0.38	1.42
N: number, Cq: quantification cycle，SD: standard deviation，CV: coefficient of variation
